# Supplementary material
Source: PubMed Central journal article supplement (PMC2654745)
Supplement: en.2008-0840_1.pdf [file en.2008-0840_1.pdf]

**Table I: Primers used for real time RT-PCR analysis**

| S. No. | Gene name                                    | Primer sequence (5'to 3')                         | Annealing temp (°C) | Product size (bp) |
|--------|----------------------------------------------|---------------------------------------------------|---------------------|-------------------|
| 1      | ACVRIB F<br>ACVRIB R                         | CCCAGTGGTCACCTCAAGGAGC<br>CTGGCGGTTGTGATAGACACGC  | 65                  | 156               |
| 2      | TGFβRIII F<br>TGFβRIII R                     | ACCGTGATGGGCATTG<br>TGGGGAAGGAGGAAGACCC           | 58                  | 112               |
| 3      | SC4MOL F<br>SC4MOL R                         | GGGAAAGAATGCCAAGATGGT<br>TGGAGCCTGAAACTCATGATG    | 60                  | 152               |
| 4      | CTGF F<br>CTGF R                             | TGCCCTCGCGGCTTACCGA<br>GTGGAGATGCCCATCCCACAGG     | 70                  | 126               |
| 5      | Decorin F<br>Decorin R                       | GATGAGGCTTCTGGGATAGG<br>AAGGGAAGGAGGAAGACCC       | 54                  | 147               |
| 6      | Follistatin F<br>Follistatin R               | AACTTGTCGGGATGTTTTCTGTCC<br>ATCTGCCCAGCAGGCAGGT   | 60                  | 190               |
| 7      | HMGCR F<br>HMGCR R                           | TGATTGGAGTTGGTACCATG<br>ATGGCTGAGCTGCCAAAT        | 63                  | 196               |
| 8      | CRHBP F<br>CRHBP R                           | GACAGACCCCAACCTCTTTCC<br>TGTCCAGGGTGAGATCAGATA    | 57                  | 147               |
| 9      | Inh-α F<br>Inh-α R                           | GAAGGGTAGAAGAGGGTGGG<br>GCAGCACCATAGCTCACCT       | 63                  | 130               |
| 10     | Inh-β <sub>A</sub> F<br>Inh-β <sub>A</sub> R | CATCACGTTTGCCGAGTCAGGAA<br>GAGGCGGATGGTGACTTTGGTC | 70                  | 157               |
| 11     | SCD F<br>SCD R                               | CTGTGCTCCCCTGCCACAC<br>GCTGGCCCACTGGCTCAAC        | 64                  | 144               |
| 12     | SCARB1 F<br>SCARB1 R                         | GGAACGGGCTGAGCAAGGA<br>GGCTGTAGAATCCAGCGAGG       | 58                  | 121               |
| 13     | MOCOS F<br>MOCOS R                           | CGCCTGGCAGGAACTGTCTA<br>TCATGGGTGAGCTTGCTGC       | 60                  | 143               |
| 14     | NPC-1 F<br>NPC-1 R                           | AATGCAAGTGACAAAGGAGAGG<br>ACACAGCCAGGGTTTCGG      | 63                  | 119               |
| 15     | PAPPA1 F<br>PAPPA1 R                         | GAGCAGAGCTGCGTGCACCT<br>CGTAGCCTGTCCGGCAGCT       | 67                  | 136               |
| 16     | SERPINE1 F<br>SERPINE1R                      | TGGGTGAAGACACACACAAAAGGG<br>GATTTGTGGAAGAGGCGGCG  | 60                  | 141               |
| 17     | PDE4D F<br>PDE4D R                           | CCGGAAGTCCCTCCATTGCC<br>GGGTGATCTTTTGCTAGGTGCTC   | 65                  | 148               |
| 18     | PKIA F<br>PKIA R                             | GTGGGGAAGCCCAGGGAGA<br>GGTTCCTGCAATGCAGCACAG      | 65                  | 164               |
| 19     | PTPN F<br>PTPN R                             | GTGCCAATAACACGGACCAAAT<br>GGCAGTGAATAATTCAGTTCTGC | 65                  | 182               |
| 20     | RUNX-1 F<br>RUNX-1 R                         | AGAACCTCGAAGACATCGGCA<br>GGCTGGGTGGTGTGGGCT       | 65                  | 130               |
| 21     | A2M F<br>A2M R                               | TCTGGGTCAGTCTCAACA<br>AGGGCATTGCGGACAAC           | 54                  | 128               |
| 22     | LHR F<br>LHR R                               | TGCAGGCCCTGCCGAGCTAT<br>AAGCACAGCAGTGCTGGGG       | 74                  | 151               |
| 23     | PKCδ F<br>PKCδ R                             | CCGAGCGCTGCAAGAAGAA<br>GTTGGGAAGTGGCCTCGTC        | 60                  | 148               |
| 24     | StAR F<br>StAR R                             | AAGGGGCTGAGGCAACA<br>CTTCCAGCCGAGAACCGAG          | 60                  | 133               |
| 25     | 3βHSD F<br>3βHSD R                           | TGGGGAAGGAGGCCATTCC<br>CCCAGGCCACGTTGCCAAC        | 67                  | 122               |

|    |                        |                                                  |    |     |
|----|------------------------|--------------------------------------------------|----|-----|
| 26 | CYP11A1 F<br>CYP11A1 R | CGAGGACATCAAGGCCAACGT<br>CCTCTGCCCCGAGCATATCC    | 64 | 128 |
| 27 | CYP19A1 F<br>CYP19A1 R | CAATACCAGGTCCTGGCTAC<br>CCTCTCCAGAGATCCAGAC      | 60 | 141 |
| 28 | L19 F<br>L19 R         | GCCAACTCCCGTCAGCAGA<br>TGGCTGTACCCTTCCGCTT       | 60 | 154 |
| 29 | LDLR F<br>LDLR R       | CTGTGACTCAGACCGGGAC<br>CGAGCCATCTTCGCAGTC        | 60 | 151 |
| 30 | PTGIS F<br>PTGIS R     | GGGGACAAGGACCACATGTGC<br>TCCTCTGACACACCCATCTCCTC | 68 | 140 |
| 31 | PTGFR F<br>PTGFR R     | TGGGGCTCTTAGCCCTTGGTG<br>GATCTGCCTTGTCTGTGCTGCTG | 68 | 103 |
| 32 | BMP2 F<br>BMP2 R       | GGCATCCTCTCCACAAAA<br>AGCCACAATCCAGTCATTC        | 60 | 131 |
| 33 | SFRP2 F<br>SFRP2 R     | CAACCTGCAGCTGTGCCA<br>CTGCTTCATGACCAGCGG         | 60 | 124 |
