# Supplementary material
Source: PubMed Central journal article supplement (PMC2654745)
Supplement: en.2008-0840_2.pdf [file en.2008-0840_2.pdf]

## Molecular Function - CET Treatment

| Ontology                                                                                              | Genes     | Up        | Down      | Array      | z-up        | z-down       |
|-------------------------------------------------------------------------------------------------------|-----------|-----------|-----------|------------|-------------|--------------|
| catalytic activity                                                                                    | 494       | 270       | 224       | 3999       | -1.22       | 2.52         |
| nucleotide binding                                                                                    | 207       | 110       | 97        | 1641       | -0.76       | 2.03         |
| DNA binding                                                                                           | 204       | 140       | 64        | 1709       | 1.81        | -2.41        |
| hydrolase activity                                                                                    | 183       | 98        | 85        | 1695       | -2.37       | 0.22         |
| molecular transducer activity                                                                         | 151       | 111       | 40        | 1318       | 1.9         | -3.34        |
| signal transducer activity                                                                            | 151       | 111       | 40        | 1318       | 1.9         | -3.34        |
| receptor activity                                                                                     | 117       | 90        | 27        | 994        | 2.44        | -3.35        |
| oxidoreductase activity                                                                               | 77        | 36        | 41        | 545        | -0.51       | 2.9          |
| RNA binding                                                                                           | 72        | 30        | 42        | 567        | -1.76       | 2.83         |
| transmembrane receptor activity                                                                       | 70        | 58        | 12        | 617        | 2.23        | -3.5         |
| all                                                                                                   | 69        | 32        | 37        | 505        | -0.73       | 2.57         |
| molecular_function                                                                                    | 68        | 32        | 36        | 493        | -0.58       | 2.52         |
| <b>cytoskeletal protein binding</b>                                                                   | <b>59</b> | <b>44</b> | <b>15</b> | <b>361</b> | <b>3.77</b> | <b>-0.67</b> |
| <b>actin binding</b>                                                                                  | <b>40</b> | <b>31</b> | <b>9</b>  | <b>253</b> | <b>3.18</b> | <b>-1</b>    |
| iron ion binding                                                                                      | 37        | 15        | 22        | 217        | -0.14       | 3.6          |
| transferase activity, transferring glycosyl groups                                                    | 35        | 22        | 13        | 198        | 2.18        | 1.09         |
| G-protein coupled receptor activity                                                                   | 30        | 26        | 4         | 306        | 0.93        | -2.95        |
| metal ion transmembrane transporter activity                                                          | 30        | 25        | 5         | 223        | 2.38        | -1.86        |
| rhodopsin-like receptor activity                                                                      | 22        | 18        | 4         | 236        | 0.29        | -2.31        |
| cation channel activity                                                                               | 21        | 18        | 3         | 179        | 1.52        | -2.02        |
| manganese ion binding                                                                                 | 21        | 15        | 6         | 119        | 2.32        | 0.07         |
| cysteine-type peptidase activity                                                                      | 20        | 8         | 12        | 113        | -0.03       | 2.82         |
| oxidoreductase activity, acting on paired donors, with incorporation or reduction of molecular oxygen | 17        | 6         | 11        | 86         | -0.06       | 3.4          |
| <b>transmembrane receptor protein kinase activity</b>                                                 | <b>15</b> | <b>13</b> | <b>2</b>  | <b>73</b>  | <b>3.54</b> | <b>-0.86</b> |
| monooxygenase activity                                                                                | 14        | 7         | 7         | 69         | 0.97        | 2.02         |
| UDP-glycosyltransferase activity                                                                      | 14        | 12        | 2         | 79         | 2.78        | -0.98        |
| <b>diacylglycerol binding</b>                                                                         | <b>13</b> | <b>10</b> | <b>3</b>  | <b>51</b>  | <b>3.46</b> | <b>0.32</b>  |
| oxidoreductase activity, acting on CH-OH group of donors                                              | 13        | 4         | 9         | 95         | -1.12       | 2.07         |
| oxidoreductase activity, acting on the CH-OH group of donors, NAD or NADP as acceptor                 | 13        | 4         | 9         | 87         | -0.93       | 2.36         |
| lipid transporter activity                                                                            | 12        | 5         | 7         | 61         | 0.32        | 2.38         |
| transmembrane receptor protein tyrosine kinase activity                                               | 12        | 10        | 2         | 61         | 2.81        | -0.59        |
| tubulin binding                                                                                       | 12        | 9         | 3         | 54         | 2.72        | 0.22         |
| protein transporter activity                                                                          | 11        | 2         | 9         | 63         | -1.23       | 3.46         |
| transferase activity, transferring pentosyl groups                                                    | 11        | 5         | 6         | 38         | 1.44        | 3.11         |
| unfolded protein binding                                                                              | 11        | 2         | 9         | 90         | -1.82       | 2.25         |
| <b>microtubule binding</b>                                                                            | <b>10</b> | <b>8</b>  | <b>2</b>  | <b>42</b>  | <b>3</b>    | <b>-0.04</b> |

Z-scores were determined using GeneSifter software. Criteria for inclusion in the table were an ontology having a z-score = 2 or = -2 in z-up or z-down column and gene list column containing 10 genes. Genes - number of genes differentially expressed within the assigned Molecular Function ontology; Array- the number of genes on the microarray assigned to the particular gene ontology. Significant z-scores and corresponding numbers of genes in each category are shown in bold.

## Molecular Function – CET + LH Treatment

| Ontology                                                                           | Genes     | Up        | Down      | Array      | z-up        | z-down       |
|------------------------------------------------------------------------------------|-----------|-----------|-----------|------------|-------------|--------------|
| catalytic activity                                                                 | 389       | 163       | 226       | 3999       | -0.99       | -4.46        |
| molecular transducer activity                                                      | 188       | 70        | 118       | 1318       | 1.85        | 2.76         |
| signal transducer activity                                                         | 188       | 70        | 118       | 1318       | 1.85        | 2.76         |
| receptor activity                                                                  | 153       | 51        | 102       | 994        | 1.29        | 4.03         |
| transferase activity                                                               | 130       | 58        | 72        | 1337       | 0.01        | -2.62        |
| transmembrane receptor activity                                                    | 100       | 30        | 70        | 617        | 0.66        | 4.2          |
| transferase activity, transferring phosphorus-containing groups                    | 70        | 33        | 37        | 737        | 0.2         | -2.29        |
| cytoskeletal protein binding                                                       | 51        | 15        | 36        | 361        | -0.17       | 2.14         |
| G-protein coupled receptor activity                                                | 50        | 14        | 36        | 306        | 0.21        | 3.21         |
| structural molecule activity                                                       | 48        | 11        | 37        | 507        | -2.45       | 0.16         |
| identical protein binding                                                          | 44        | 8         | 36        | 338        | -1.8        | 2.57         |
| rhodopsin-like receptor activity                                                   | 41        | 13        | 28        | 236        | 0.9         | 2.87         |
| hydrolase activity, acting on acid anhydrides                                      | 39        | 12        | 27        | 487        | -2.07       | -1.38        |
| actin binding                                                                      | 38        | 11        | 27        | 253        | 0.01        | 2.22         |
| hydrolase activity, acting on acid anhydrides, in phosphorus-containing anhydrides | 38        | 12        | 26        | 485        | -2.05       | -1.54        |
| pyrophosphatase activity                                                           | 38        | 12        | 26        | 484        | -2.05       | -1.53        |
| alkali metal ion binding                                                           | 29        | 12        | 17        | 159        | 2           | 1.77         |
| peptide binding                                                                    | 24        | 9         | 15        | 124        | 1.61        | 2.17         |
| <b>cytokine activity</b>                                                           | <b>23</b> | <b>12</b> | <b>11</b> | <b>141</b> | <b>2.45</b> | <b>0.32</b>  |
| magnesium ion binding                                                              | 23        | 10        | 13        | 326        | -1.14       | -2.23        |
| enzyme activator activity                                                          | 21        | 12        | 9         | 256        | 0.28        | -2.27        |
| sodium ion binding                                                                 | 19        | 7         | 12        | 91         | 1.58        | 2.26         |
| protein binding, bridging                                                          | 15        | 6         | 9         | 67         | 1.86        | 2.02         |
| <b>cysteine-type peptidase activity</b>                                            | <b>12</b> | <b>10</b> | <b>2</b>  | <b>113</b> | <b>2.37</b> | <b>-2.22</b> |
| <b>growth factor binding</b>                                                       | <b>12</b> | <b>7</b>  | <b>5</b>  | <b>63</b>  | <b>2.65</b> | <b>0.25</b>  |
| kinase binding                                                                     | 12        | 2         | 10        | 75         | -0.71       | 2.1          |
| <b>phosphoric diester hydrolase activity</b>                                       | <b>12</b> | <b>7</b>  | <b>5</b>  | <b>63</b>  | <b>2.65</b> | <b>0.25</b>  |

Z-scores were determined using GeneSifter software. Criteria for inclusion in the table were an ontology having a z-score = 2 or = -2 in z-up or z-down column and gene list column containing 10 genes. Genes - number of genes differentially expressed within the assigned Molecular Function ontology; Array- the number of genes on the microarray assigned to the particular gene ontology. Significant z-scores and corresponding numbers of genes in each category are shown in bold.

## Molecular Function –PGF<sub>2α</sub> Treatment

| Ontology                                                                                              | Genes      | Up        | Down      | Array       | z-up        | z-down       |
|-------------------------------------------------------------------------------------------------------|------------|-----------|-----------|-------------|-------------|--------------|
| protein binding                                                                                       | 417        | 267       | 150       | 5570        | 3.8         | -2.67        |
| catalytic activity                                                                                    | 286        | 140       | 146       | 3999        | -2.26       | 2.29         |
| <b>molecular transducer activity</b>                                                                  | <b>138</b> | <b>96</b> | <b>42</b> | <b>1318</b> | <b>6.27</b> | <b>0.1</b>   |
| <b>signal transducer activity</b>                                                                     | <b>138</b> | <b>96</b> | <b>42</b> | <b>1318</b> | <b>6.27</b> | <b>0.1</b>   |
| transition metal ion binding                                                                          | 132        | 70        | 62        | 2148        | -2.11       | -0.75        |
| nucleic acid binding                                                                                  | 113        | 57        | 56        | 2474        | -5.02       | -2.82        |
| <b>receptor activity</b>                                                                              | <b>108</b> | <b>75</b> | <b>33</b> | <b>994</b>  | <b>5.8</b>  | <b>0.34</b>  |
| zinc ion binding                                                                                      | 97         | 53        | 44        | 1795        | -2.61       | -1.82        |
| DNA binding                                                                                           | 74         | 43        | 31        | 1709        | -3.53       | -3.41        |
| calcium ion binding                                                                                   | 70         | 49        | 21        | 694         | 4.11        | -0.18        |
| <b>receptor binding</b>                                                                               | <b>67</b>  | <b>50</b> | <b>17</b> | <b>550</b>  | <b>6.1</b>  | <b>-0.07</b> |
| transmembrane receptor activity                                                                       | 62         | 39        | 23        | 617         | 2.91        | 0.86         |
| oxidoreductase activity                                                                               | 52         | 21        | 31        | 545         | -0.26       | 3.49         |
| carbohydrate binding                                                                                  | 30         | 24        | 6         | 212         | 5.39        | -0.26        |
| RNA binding                                                                                           | 30         | 13        | 17        | 567         | -2.2        | -0.2         |
| actin binding                                                                                         | 26         | 17        | 9         | 253         | 2.15        | 0.38         |
| iron ion binding                                                                                      | 26         | 9         | 17        | 217         | 0.06        | 4            |
| gated channel activity                                                                                | 25         | 14        | 11        | 206         | 2           | 1.83         |
| <b>cytokine activity</b>                                                                              | <b>23</b>  | <b>21</b> | <b>2</b>  | <b>141</b>  | <b>6.54</b> | <b>-1.18</b> |
| electron carrier activity                                                                             | 20         | 8         | 12        | 182         | 0.22        | 2.69         |
| sugar binding                                                                                         | 18         | 14        | 4         | 130         | 3.89        | -0.04        |
| voltage-gated channel activity                                                                        | 17         | 10        | 7         | 128         | 2.15        | 1.52         |
| voltage-gated ion channel activity                                                                    | 17         | 10        | 7         | 128         | 2.15        | 1.52         |
| oxidoreductase activity, acting on paired donors, with incorporation or reduction of molecular oxygen | 16         | 6         | 10        | 86          | 1.37        | 4.53         |
| pattern binding                                                                                       | 15         | 13        | 2         | 85          | 5.25        | -0.42        |
| <b>protein complex binding</b>                                                                        | <b>15</b>  | <b>14</b> | <b>1</b>  | <b>81</b>   | <b>6.04</b> | <b>-0.99</b> |
| receptor signaling protein activity                                                                   | 15         | 12        | 3         | 110         | 3.65        | -0.25        |
| vitamin binding                                                                                       | 15         | 6         | 9         | 105         | 0.86        | 3.21         |
| glycosaminoglycan binding                                                                             | 14         | 12        | 2         | 78          | 5.07        | -0.29        |
| polysaccharide binding                                                                                | 14         | 12        | 2         | 78          | 5.07        | -0.29        |
| growth factor activity                                                                                | 13         | 10        | 3         | 120         | 2.37        | -0.4         |
| heme binding                                                                                          | 13         | 3         | 10        | 91          | -0.38       | 4.31         |
| monooxygenase activity                                                                                | 13         | 4         | 9         | 69          | 0.73        | 4.73         |
| protease inhibitor activity                                                                           | 13         | 9         | 4         | 103         | 2.41        | 0.43         |
| tetrapyrrole binding                                                                                  | 13         | 3         | 10        | 91          | -0.38       | 4.31         |
| endopeptidase inhibitor activity                                                                      | 12         | 9         | 3         | 100         | 2.5         | -0.08        |
| exopeptidase activity                                                                                 | 11         | 5         | 6         | 77          | 1.08        | 2.35         |
| transmembrane receptor protein kinase activity                                                        | 11         | 5         | 6         | 73          | 1.2         | 2.5          |
| G-protein-coupled receptor binding                                                                    | 10         | 9         | 1         | 52          | 4.84        | -0.5         |
| growth factor binding                                                                                 | 10         | 9         | 1         | 63          | 4.11        | -0.71        |
| heparin binding                                                                                       | 10         | 9         | 1         | 61          | 4.23        | -0.67        |

Z-scores were determined using GeneSifter software. Criteria for inclusion in the table were an ontology having a z-score = 2 or = -2 in z-up or z-down column and gene list column containing 10 genes. Genes - number of genes differentially expressed within the assigned Molecular Function ontology; Array- the number of genes on the microarray assigned to the particular gene ontology. Significant z-scores and corresponding numbers of genes in each category are shown in bold.
