# Supplementary material
Source: PubMed Central journal article supplement (PMC2654745)

# Figure 2

## Exp . II (CET+LH)

### Molecular Function

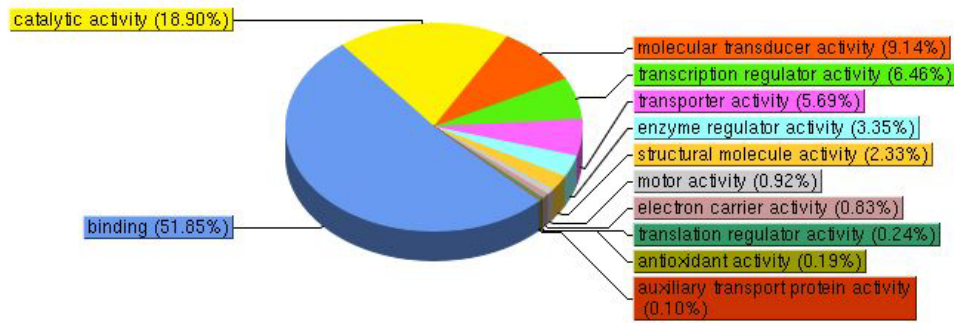

### Cellular Component

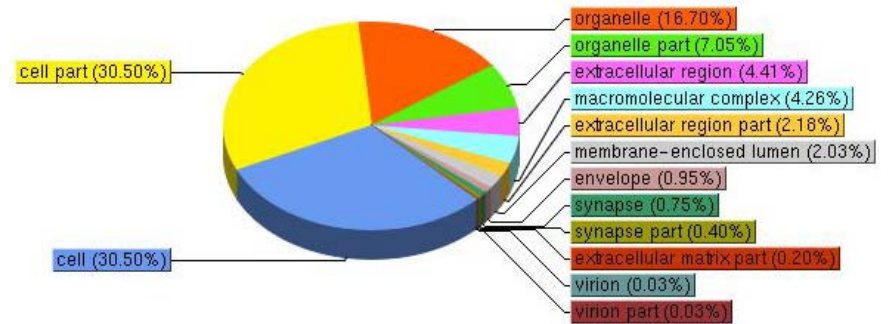

### Biological process

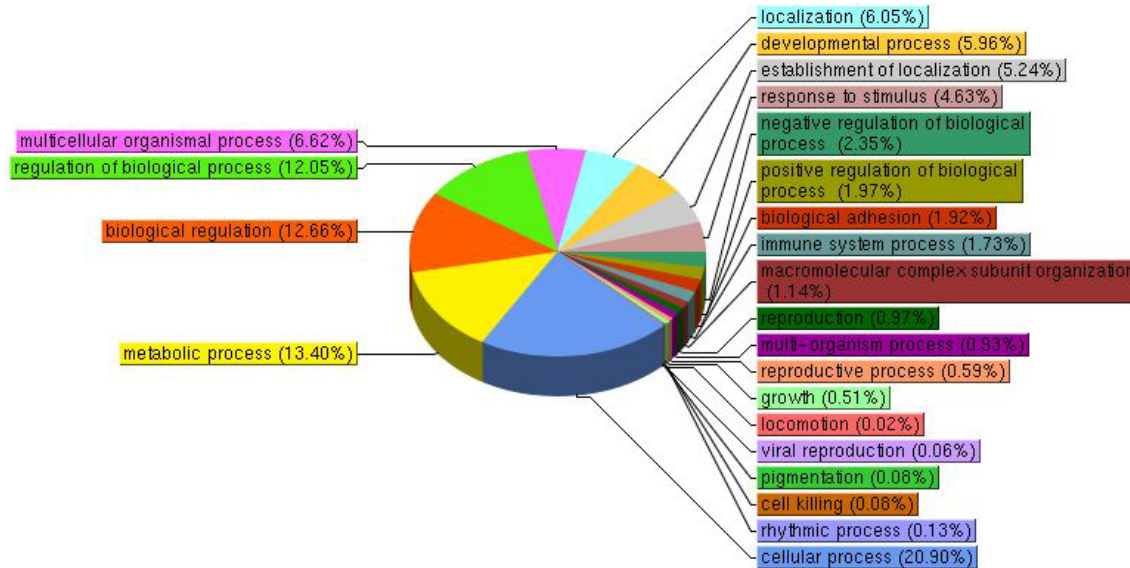

Supplement: en.2008-0840_4.pdf [file en.2008-0840_4.pdf]

# Figure 3

## Exp . III (PGF<sub>2α</sub>)

### Molecular Function

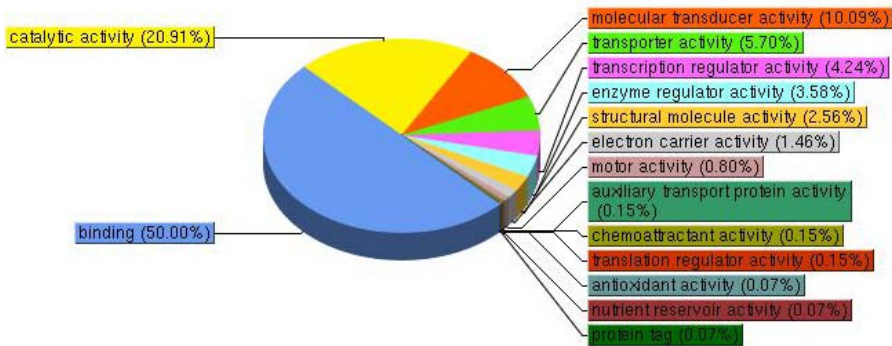

### Cellular Component

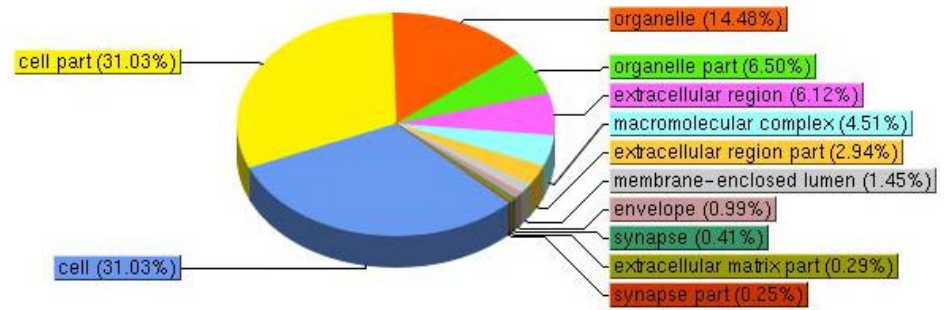

### Biological process

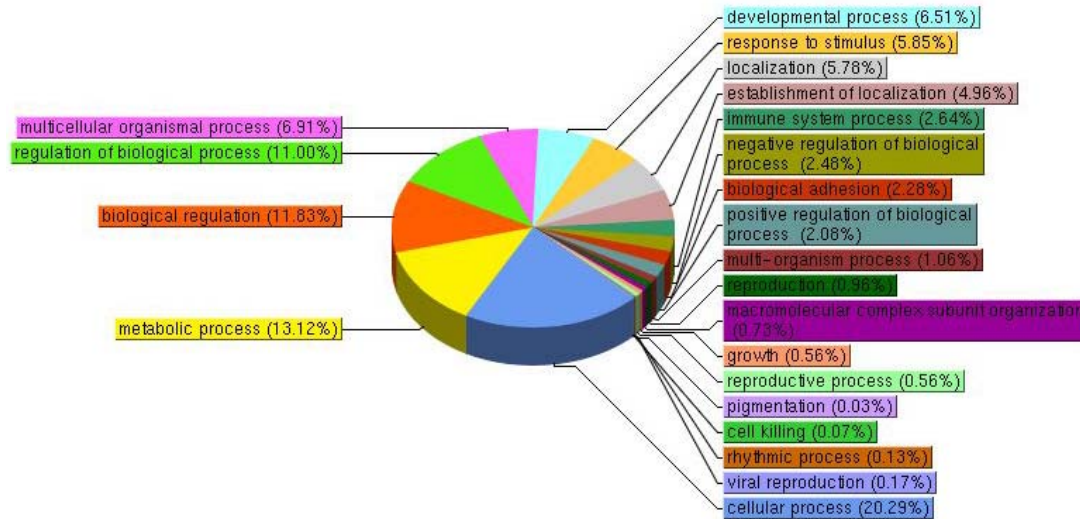

Supplement: en.2008-0840_5.pdf [file en.2008-0840_5.pdf]
